1 Identification of immunoreactive linear epitopes of *Borrelia miyamotoi*

2

3 Rafal Tokarz<sup>a#</sup>, Teresa Tagliafierro<sup>a</sup>, Adrian Caciula<sup>a</sup>, Nischay Mishra<sup>a</sup>, Riddhi Thakkar<sup>a</sup>,

4 Lokendra V Chauhan<sup>a</sup>, Stephen Sameroff<sup>a</sup>, Shannon Delaney<sup>b</sup>, Gary P. Wormser<sup>c</sup>,

5 Adriana Marques<sup>d</sup>, W. Ian Lipkin<sup>a</sup>

6

7 <sup>a</sup>Center for Infection and Immunity, Mailman School of Public Health, Columbia

8 University, New York, NY

9 <sup>b</sup>Department of Psychiatry, Columbia University, New York, NY

10 <sup>c</sup>Division of Infectious Diseases, New York Medical College, Valhalla, NY

11 <sup>d</sup>Laboratory of Clinical Immunology and Microbiology, National Institute of Allergy and

12 Infectious Diseases, National Institutes of Health, Bethesda, Maryland.

13

14 #Corresponding author

15 Rafal Tokarz

16 Center for Infection and Immunity

17 Mailman School of Public Health, Columbia University

18 722 West 168th Street, Room 1701, New York, NY 10032

19 phone: (212) 631 335 5021

20 Email: [rt2249@columbia.edu](mailto:rt2249@columbia.edu)

21

22

23

24

25 Running title: Reactive linear epitopes of *Borrelia miyamotoi*

26

27 **Abstract**

28 *Borrelia miyamotoi* is an emerging tick-borne spirochete transmitted by *Ixodid* ticks.  
29 Current serologic assays for *B. miyamotoi* are impacted by genetic similarities to other  
30 *Borrelia* and limited understanding of optimal antigenic targets. In this study, we  
31 employed the TBD-Serochip, a peptide array platform, to identify new linear targets for  
32 serologic detection of *B. miyamotoi*. We examined a wide range of suspected *B.*  
33 *miyamotoi* antigens and identified 352 IgM and 91 IgG reactive peptides, with the  
34 majority mapping to variable membrane proteins. These included peptides within  
35 conserved fragments of variable membrane proteins that may have greater potential for  
36 differential diagnosis. We also identified reactive regions on FlaB, and demonstrate  
37 crossreactivity of *B. burgdorferi* C6 with a *B. miyamotoi* C6-like peptide. The panel of  
38 linear peptides identified in this study can be used to enhance serodiagnosis of *B.*  
39 *miyamotoi*.

40

41

42

43

44

45

46

47

48

49

50

51

52

## 53 **Introduction**

54 *Borrelia miyamotoi* is a tick-borne relapsing fever spirochete found throughout temperate  
55 regions worldwide that is transmitted by hard ticks of the genus *Ixodes* (1-5). *B.*  
56 *miyamotoi* was discovered in 1995; however, the link to disease was first established in  
57 2011 when it was implicated in an outbreak of tick-borne illness in Russia (1, 6). *B.*  
58 *miyamotoi* is primarily transmitted by *I. scapularis* and *I. pacificus* in North America, and  
59 *I. ricinus* and *I. persulcatus* in Europe and Asia (6-9). These tick species also transmit  
60 *Borreliae* that cause Lyme borreliosis (10). Lyme borreliosis is the most common vector-  
61 borne disease in the United States, where most infections are caused by *Borrelia*  
62 *burgdorferi* and transmitted by *Ixodes scapularis*. Despite sharing the same vectors, *B.*  
63 *miyamotoi* differs from *B. burgdorferi* in a number of ecological aspects, including the  
64 ability for transovarial transmission, quicker transmission during tick feeding, and lower  
65 infection rates in vector ticks. The prevalence of *B. miyamotoi* in nymphs is typically 1%  
66 to 5% versus 15% to 25% for *B. burgdorferi* (11-15). Nonetheless, *B. miyamotoi* and *B.*  
67 *burgdorferi* can occasionally infect the same tick, and concurrent human infections have  
68 been reported (5, 15, 16).

69

70 Symptomatic infections with *B. miyamotoi* (*Borrelia miyamotoi* disease; BMD) usually  
71 present with fever and other non-specific symptoms including fatigue, headache, chills  
72 and nausea (17, 18). Bouts of relapsing fever may occur in untreated patients. In the  
73 United States, reports of BMD are rare with less than 200 cases identified between 2011  
74 and 2017 (3, 19, 20). This is considerably less than would be expected based on the  
75 high incidence of other tick-borne diseases and suggests a substantial underreporting of  
76 *B. miyamotoi* infections (21). A portion of infections may be asymptomatic while  
77 symptomatic infections may not be identified because of a similar presentation to certain  
78 other tick-borne illnesses and the lack of optimal diagnostic tests (22-24). Patients with

79 BMD may test positive on the C6 ELISA, a serologic assay used in the diagnosis of  
80 Lyme disease (20, 25, 26). Current methods of BMD diagnosis include PCR (in the  
81 acute stage), and a two-tiered antibody assay (ELISA and western blot) based on  
82 immunoreactivity to glycerophosphodiester phosphodiesterase (GlpQ), an enzyme  
83 present in *B. miyamotoi* but absent in Lyme *Borrelia* (17, 27). Because GlpQ homologs  
84 are present in other relapsing fever spirochetes and in other bacteria, its specificity for *B.*  
85 *miyamotoi* is limited (28-31). In addition, serologic assays based on reactivity to GlpQ  
86 are only reactive in 56% to 78% of sera from convalescent BMD patients and only 16%  
87 of sera from individuals with acute disease (3, 32). Thus, other targets are needed in  
88 order to develop more sensitive and specific serologic tests.

89 An alternative approach for BMD serologic diagnosis is the development of assays that  
90 target outer surface antigens. Although this approach has been applied for diagnosis of  
91 Lyme borreliosis, relatively little is known about the utility of outer surface antigens in  
92 diagnosis of BMD. The primary challenge in assay development is the rapid antigenic  
93 variation that is a characteristic of relapsing fever spirochetes (33-36). Like all relapsing  
94 fever *Borreliae*, the genome of *B. miyamotoi* contains linear plasmids that encode  
95 multiple alleles of variable major proteins (Vmps) (36-38). Vmps consist of two types of  
96 lipoproteins that are dissimilar in sequence and length: the variable small proteins (Vsps)  
97 and variable large proteins (Vlps)(39). At any given time, only one Vmp is expressed by  
98 the spirochete when a single allele is copied into the Vmp expression site. Relapsing  
99 fever *Borreliae* alternate expression of these Vmps in order to evade the host immune  
100 response (31, 32, 38). The alleles are genetically heterogenous; thus, it is unlikely that  
101 host IgM raised against one Vmp will neutralize spirochetes expressing another Vmp.  
102 Despite high genetic diversity, Vmps share conserved regions that may also be a target  
103 of neutralizing antibodies. Identifying these regions could be useful for diagnosis,

104 particularly early in disease (37, 39). In this study, we employed the Tick-borne disease  
105 Serochip (TBD-Serochip), a novel serologic peptide array platform, to examine the  
106 antibody response in human patients with BMD to a wide array of *B. miyamotoi* antigens.  
107 Our work identified linear epitopes that could be applied in the development of improved  
108 diagnostic tests (40).

109

## 110 **Materials and Methods**

111 **TBD-Serochip.** The TBD-Serochip is a peptide array that consists of approximately  
112 170,000 12-mer linear peptides designed from the protein sequence of the primary  
113 antigens of *Anaplasma phagocytophilum*, *B. burgdorferi*, *B. miyamotoi*, *Babesia microti*,  
114 *Rickettsia rickettsii*, *Ehrlichia chaffeensis*, Powassan virus and Heartland virus (40). The  
115 12-mer peptides tile the sequence of each antigen with an 11 amino acid (aa) overlap to  
116 the preceding 12-mer peptide in a sliding window pattern. Antigens selected for inclusion  
117 on the TBD-Serochip were all previously reported to elicit an antibody response in  
118 humans. For *B. miyamotoi*, the TBD-Serochip includes 12-mer peptides designed from  
119 a wide array of Vmp and non-Vmp antigens (**Table 1**). For each selected antigen, we  
120 downloaded every available homologous protein sequence from the NCBI protein  
121 database. Sequences were aligned and used to design 12-mer peptides, with redundant  
122 peptides excluded prior to synthesis. This approach resulted in the TBD-Serochip  
123 incorporating peptides to all genetic variants of every included antigen.

124 **Sera.** We tested seven convalescent-phase sera from patients diagnosed with BMD.  
125 Five sera originated from New York Medical College, and 2 from Tufts University.  
126 Diagnosis of BMD was made during the acute disease phase, six by PCR, and one by a  
127 GlpQ-based serologic assay (**Table 2**). We contrasted these data with TBD-Serochip  
128 data obtained from sera from patients with Lyme disease (N=100), and healthy

129 individuals with no history of Lyme disease (N=16). All sera were tested at a 1:50  
130 dilution. We used de-identified human sera from our previous work with the TBD-  
131 Serochip, and additional samples acquired from the National Institutes of Health (40).  
132 These samples were obtained under clinical protocols (ClinicalTrials.gov  
133 Identifier [NCT00028080](https://clinicaltrials.gov/ct2/show/study/NCT00028080) and NCT00001539) approved by the institutional review board  
134 of the National Institute of Allergy and Infectious Diseases, and all participants signed  
135 informed consent. Sample types ranged from early to late Lyme disease (confirmed by  
136 the two-tiered testing algorithm). All methods used for sample collection were performed  
137 in accordance with the proper guidelines and regulations.

138

139 ***Epitope identification.*** Following antibody incubations, the arrays were scanned on  
140 NimbleGen MS 200 Microarray Scanner (Roche) to generate raw fluorescent intensity  
141 data sets that were then subjected to quantile normalization. IgM and IgG reactivity were  
142 examined separately. Based on the data obtained from healthy controls, we computed a  
143 cut-off threshold for each epitope that was defined by calculating the mean plus 3  
144 standard deviations of the signal intensity for the same epitope. We then filtered out any  
145 peptides with signal intensities below threshold in all experiments. To identify peptides  
146 that could be used to differentiate between BMD and healthy control sera, we used the  
147 non-parametric Wilcoxon rank sum test and identified peptides that yielded a statistically  
148 significant signal (q value  $\leq 0.05$  for both IgM and IgG, corrected for multiple testing using  
149 Benjamini-Hochberg Procedure). This identified the optimal sets of IgM and IgG 12-mer  
150 peptides that were reactive in sera with BMD, but not in healthy individuals. A portion of  
151 these 12-mer peptides were assembled into longer contigs that were then ranked by the  
152 average signal intensity.

153

154 **Luciferase ImmunoPrecipitation System assay (LIPS)**. We generated a *Renilla*  
155 luciferase-GlpQ construct for detection of anti-GlpQ IgG antibody. The complete GlpQ  
156 coding sequence was amplified by PCR from a *B. miyamotoi*-positive *I. scapularis* using  
157 primers 5'-GGATCCATGAAATTAATAACTAATGC-3' and 5'-  
158 GAGCTCTTATTTTTTATGAAGTTCATT-3'. The PCR product was cloned into pREN2  
159 vector and the fusion proteins were generated in Cos-1 cells. Light units were measured  
160 in a Berthold LB 960 Centro microplate luminometer (Berthold Technologies) using a  
161 Renilla Luciferase Assay System kit (Promega) and MikroWin 2010 software.

162

## 163 **Results**

164 Of the 23,946 *B. miyamotoi* 12-mer peptides present on the TBD-Serochip, we identified  
165 1491 peptides that were significantly reactive with IgM antibodies present in the seven  
166 BMD sera tested. Through assembly of overlapping reactive 12-mer peptides, we  
167 identified 352 reactive epitopes made up of 2 or more consecutive reactive peptides. For  
168 IgG, we identified 429 peptides that were clustered into 91 putative epitopes. All IgM and  
169 IgG epitopes were then mapped to specific regions within *B. miyamotoi* proteins. The  
170 majority of the epitopes mapped to Vmps (**Table 3**).

171 In addition to *B. miyamotoi* peptides, we examined the reactivity to peptides from other  
172 tick-borne agents. In 2 samples, we detected IgG reactivity to specific epitopes of *B.*  
173 *burgdorferi* that were identified in our previous work (40). Subsequent examination of  
174 clinical history of these 2 individuals revealed that both had previously been diagnosed  
175 with Lyme disease.

176

177 **Reactivity to Vsp peptides**. The TBD-Serochip contains 12-mer peptides designed  
178 from the amino acid (aa) sequence of 13 full length and 4 partial Vsp paralogs (**Table 1**).  
179 *B. miyamotoi* Vsps are approximately 220 aa in length and consist of a conserved N-

180 terminal fragment of approximately 85 aa, followed by highly variable regions (**Figure**  
181 **1A**). We identified IgM-reactive epitopes within both the conserved and variable  
182 fragments within every Vsp homolog. Although previous studies that were focused on  
183 Vsp1 suggested that it may be a major immunodominant antigen of *B. miyamotoi*, our  
184 data revealed Vsp4 to be more immunoreactive (**Figure 1B** and **1C**). Among the  
185 immunodominant regions of Vsps included a region within the N-terminal fragment that  
186 was reactive with IgM in 5 out of 7 sera (sera 2 and 4 - 7). This 16 aa peptide,  
187 designated VS-C-1, spans aa 52 to 66 of Vsp1 (mapped to accession number  
188 AGS80212) and is conserved in the majority of sequenced *B. miyamotoi* Vsp paralogs  
189 (**Figure 2**).

190

191 One Vsp paralog (accession number BAA11304) contains substantial aa variation within  
192 the central portion of the VS-C-1 sequence. The aa at positions 8-12 in this paralog  
193 deviates from AVEFA to SELME (**Figure 2**). Presumably, antibodies to VS-C-1 region  
194 would not react with peptides with this divergent amino acid sequence (designated VS-  
195 C-2). Nonetheless, peptides corresponding to VS-C-2 (mapped to accession number  
196 BAA11304) were reactive with 4 of the 7 VS-C-1-reactive samples (sera 4-7), but did not  
197 react with sera from patient 2 (**Figure 3**). The presence of antibodies to both peptide  
198 variants indicates that these 4 patients were exposed to Vsp paralogs with both VS-C-1  
199 and VS-C-2 sequences.

200

201 We identified other reactive regions on Vsps, including VS-C-3 located at the end of the  
202 conserved N-terminal portion that was highly reactive in sera from patient 7 (**Figure 1B**).  
203 We also identified epitopes that were mapped to the variable fragments of Vsps.  
204 However, these epitopes were less frequently reactive than VS-C-1 or VS-C-2 (**Table 3**).  
205 OspC, a highly immunogenic *B. burgdorferi* lipoprotein, is the closest homolog to Vsp.



206 Both proteins have a high degree of homology within the N terminal region. We and  
207 others previously identified a reactive epitope within this region of OspC (39, 41, 42).  
208 The alignment of Vsp1 (AGS80212) with OspC (CAA59253) revealed that the VS-C-1  
209 and OspC epitopes do not overlap and map to non-homologous portions of these  
210 lipoproteins (**Figure 4**).

211

212 **Reactivity to Vlp peptides.** Vlps of relapsing fever *Borrelia* are typically 330 aa to 350  
213 aa in length and are classified into  $\alpha$ ,  $\beta$ ,  $\delta$ , and  $\gamma$  sub-families (38). The N-terminal 70 aa  
214 to 120 aa fragments are conserved within each subfamily, whereas the remaining  
215 portions display a substantially greater heterogeneity in aa sequence. *B. miyamotoi*  
216 encodes multiple  $\alpha$ ,  $\delta$ , and  $\gamma$  alleles and only a single putative  $\beta$ -like allele. To account for  
217 this genomic diversity, the TBD-Serochip includes peptides for 33 full length and 26  
218 partial  $\alpha$ ,  $\delta$ , and  $\gamma$  homologs from multiple *B. miyamotoi* strains (**Table 1**).

219

220 All 7 tested sera reacted with a wide range of peptides from Vlps. Although IgM reactivity  
221 was predominant, several Vlp regions were also reactive with IgG. Overall, the largest  
222 number of Vlp-reactive peptides mapped to  $\delta$  Vlps. **Figure 5** displays the location of all  
223 reactive peptides mapped to Vlp15/16 (accession number ALM31565), a Vlp homolog  
224 with the highest number of immunoreactive epitopes. A  $\delta$  Vlp-specific region, located  
225 between aa 8-24 of Vlp15/16, reacted with all seven BMD sera (**Figure 5**). We  
226 designated this region Vlp $\delta$ -C-1 (**Table 4**). Six sera were IgM-positive to Vlp $\delta$ -C-1,  
227 including two (samples 1 and 3) that were also IgG-positive. One serum (sample 2) was  
228 reactive with only IgG. Six sera were reactive with another reactive region designated  
229 Vlp $\delta$ -C-2. Two sera were reactive with IgM and IgG, two with IgM, and two with IgG. Vlp-  
230 C-2 was mapped to aa 51-66 of Vlp15/16, a fragment that is also partially conserved in

231  $\alpha$ ,  $\delta$ , and  $\gamma$  Vlps.  $\gamma$  Vlp peptides corresponding to this region (designated Vlp $\gamma$ -C-2) were  
232 reactive with four sera (all IgG) (**Figure 6, Table 3**).  $\alpha$  peptides (Vlp $\alpha$ -C2) were reactive  
233 with IgG from three sera (**Table 3**).

234

235 Only one region within the variable fragment of  $\delta$  Vlps was reactive with all seven sera.  
236 This region, mapped to aa 222-240 of Vlp 15/16, was designated Vlp $\delta$ V-1. In three sera,  
237 the reactive fragment extended approximately 25 aa downstream, and overlapped with a  
238 conserved region that is homologous to the C6 peptide of *B. burgdorferi* (**Figure 7A**).  
239 Vlp $\delta$ V-1 corresponds to a poorly conserved fragment in Vlps, even within paralogs of the  
240 same subfamily (**Figure 7A**). Nonetheless, all seven sera were reactive to a wide range  
241 of non-homologous peptides from different  $\delta$  Vlp homologs that mapped to this region  
242 (**Figure 7B**). Although the corresponding peptides from Vlp  $\alpha$  and Vlp  $\gamma$  have limited  
243 homology to Vlp $\delta$ V-1 peptides from Vlp  $\delta$ , 4 sera also had reactivity to Vlp  $\gamma$  peptides and  
244 3 sera reacted with Vlp  $\alpha$  peptides from within this region. Our results indicate that the  
245 region corresponding to Vlp-V-1 in Vlps represents a major immunogenic region within  
246 *B. miyamotoi* Vlps, irrespective of sequence similarity.

247

248 **Crossreactivity of the C6 peptides.** VlsE, the closest homolog to Vlp, is a major  
249 immunodominant *B. burgdorferi* lipoprotein and includes a 26 aa C6 epitope that is  
250 employed in a peptide ELISA for Lyme disease diagnosis. Recent studies have reported  
251 cross-reactivity in the Lyme disease C6 ELISA with sera from BMD patients (20, 26).  
252 The similarity between a C6-like region in *B. miyamotoi* and the C6 was cited as a  
253 potential cause. Comparison of *B. burgdorferi* C6 and corresponding homologous Vlp  
254 sequences indicate that some  $\delta$  Vlp15/16 homologs share 20 out of 26 aa residues with  
255 the C6 epitope (**Figure 7A**). The homology is most pronounced at the C terminal portion,

256 with 14 out of 15 identical residues in both peptides. To more clearly delineate antibody  
257 responses to these two fragments, we compared the TBD-Serochip data to results  
258 obtained with a commercial C6 ELISA. Of the seven BMD sera tested, four samples (2,  
259 5, 6, and 7) were positive on the TBD-Serochip for reactivity to the *B. miyamotoi* C6-like  
260 peptides (**Figure 8**). The same 4 samples, along with sample 3, had reactivity to the *B.*  
261 *burgdorferi* C6 peptides and all were also positive on the C6 ELISA. Sera 1 and 4 were  
262 negative with both assays. Serum 3 was positive for *B. burgdorferi* with the C6 ELISA  
263 but did not react with *B. miyamotoi* peptides on the TBD-Serochip. This discrepancy was  
264 likely due to past exposure to *B. burgdorferi*. Samples 3 and 5 both contained IgG  
265 antibodies to the C6 peptides from a prior infection with *B. burgdorferi*. These antibodies  
266 were specific for *B. burgdorferi* peptides and did not crossreact with the corresponding  
267 peptides of *B. miyamotoi* (**Figure 8**). Serum 3 did not contain antibodies to the *B.*  
268 *miyamotoi* C6-like region; thus the positive result on the *B. burgdorferi* ELISA and TBD-  
269 Serochip result was likely exclusively triggered by anti-*B. burgdorferi* antibodies. Serum  
270 5 had IgG antibodies to *B. burgdorferi*, and IgM antibodies to *B. miyamotoi* C6-like  
271 peptides. Sera 2, 6 and 7 had IgM or IgG antibodies to the *B. miyamotoi* C6-like  
272 peptides; they also reacted with the highly conserved C-terminal portion of the *B.*  
273 *burgdorferi* C6 and were the likely cause of the positive result on the C6 ELISA.

274

275 In summary, only 4 of the 7 patients with a history of *B. miyamotoi* infection had  
276 antibodies to the *B. miyamotoi* C6-like peptide. This is in contrast to the C6 which is one  
277 of the most frequently reactive linear peptides in *B. burgdorferi*. However, when they are  
278 present, the antibodies to the *B. miyamotoi* C6-like peptide will likely crossreact on the  
279 C6 ELISA.

280

281 **FlaB**. FlaB was the most reactive non-Vmp antigen. IgM antibodies to FlaB were  
282 detected in six out of seven BMD sera tested. FlaB comprises the major component of  
283 the spirochete flagellum and is among the most immunogenic of all *Borrelia* antigens  
284 (43, 44). However, its utility in diagnosis is compromised by its high cross-reactivity (45).  
285 FlaB bands can be recorded on both IgM and IgG Lyme disease western blots even in  
286 specimens from healthy individuals (46). FlaB is also highly conserved amongst *Borrelia*,  
287 with *B. miyamotoi* and *B. burgdorferi* FlaB sharing 90% aa identity. This further limits its  
288 utility for differential diagnosis. In tests of BMD or Lyme disease sera, we detected  
289 reactivity to a wide range of corresponding FlaB 12-mer peptides from both *B. miyamotoi*  
290 and *B. burgdorferi* (**Figure 9 A and B**). The same was true when we tested sera from  
291 patients with Lyme disease. We mapped the primary reactive portion of FlaB to a 45 aa  
292 fragment located between aa 192 and 236 of *B. miyamotoi* (accession number  
293 AHH05270) and its corresponding region in *B. burgdorferi* located between aa 190 and  
294 236 (accession number AAC66541) (**Figure 9 C**). We found this region to be among the  
295 most frequently reactive peptide fragments when testing sera from Lyme disease or  
296 BMD. Despite this high reactivity, the majority of 12-mer peptides within these fragments  
297 were occasionally cross-reactive with IgM antibodies present in sera from healthy  
298 individuals. Nonetheless, we identified a 14 aa fragment within this region that was  
299 reactive only with BMD and Lyme disease sera but not with control sera. This peptide,  
300 AQEGAQQEGVQAVP, was located within aa 210 and 223 of *B. miyamotoi* FlaB. The  
301 corresponding 13 aa peptide in *B. burgdorferi* VQEGVQQEQAQQP was located within  
302 aa 211 and 223. Although these peptides cannot be used to discriminate between *B.*  
303 *miyamotoi* and *B. burgdorferi*, they may have utility for diagnosis of *Borrelia* infections.  
304  
305 **GlpQ**. We did not identify a specific epitope for GlpQ. To determine whether this was  
306 due to the absence of anti-GlpQ antibodies, we established a LIPS assay using a full

307 length GIpQ as a target antigen. We tested 5 samples and IgG antibodies were present  
308 in 3 sera. Our combined TBD-Serochip and LIPS data suggests that these 3 samples  
309 contained anti-GIpQ antibodies to conformational but not linear epitopes. We propose  
310 that detection of antibodies to conformational epitopes likely constitutes the primary  
311 means of GIpQ serologic detection.

312

313 We did not identify unique epitopes on the remaining non-Vmp antigens. Although  
314 reactive peptides were detected, they were not consistently reactive among the samples  
315 tested.

316

317 **Additional specimens.** We analyzed three additional sera from patients who had  
318 received a BMD diagnosis based on a positive index on a GIpQ ELISA from a  
319 commercial laboratory. Upon testing these specimens on the TBD-Serochip, we did not  
320 observe reactivity to any *B. miyamotoi* antigens. When we examined these by our LIPS  
321 assay, one sample had a very low positive reading and the remaining two were negative.

322

### 323 **Discussion**

324 Lack of standardized assays, coupled with limited understanding of optimal target  
325 antigens contribute to the challenge of serologic diagnosis of TBD (47-49). The  
326 identification of superior targets, particularly of immunodominant specific epitopes has  
327 the potential to improve serodiagnosis. Among the primary challenges of differential  
328 serologic diagnosis of BMD is the insufficient sensitivity of GIpQ and the antigenic  
329 similarities between *B. miyamotoi* and Lyme borreliosis *Borrelia*. Through accurate  
330 mapping of specific linear immunoreactive peptides, the TBD-Serochip provides an  
331 unparalleled opportunity for identification of agent-specific linear epitopes that could  
332 facilitate differential diagnosis. In this study we used the TBD-Serochip to identify

333 peptides that can potentially serve as diagnostic targets for *B. miyamotoi* and  
334 differentiate between patients with Lyme disease and BMD.

335

336 The most promising candidate diagnostic peptide targets were found on flagella and  
337 Vmps, both well-known antigens within relapsing fever *Borreliae*. Flagellar proteins are  
338 among the most immunogenic components in spirochetes, highlighted by their inclusion  
339 as diagnostic targets in western blot assays for Lyme disease. In previous work, we  
340 identified an immunoreactive 13 aa peptide within *B. burgdorferi* FlaB with high  
341 diagnostic utility. We subsequently found that this peptide, along with the C6 fragment,  
342 were the most frequently reactive *B. burgdorferi* linear peptides in patients with Lyme  
343 disease. In addition, we observed that both peptides are often reactive in patients where  
344 reactivity to other linear peptides was not detectable. The diagnostic utility of this FlaB  
345 fragment extends to *B. miyamotoi*, as the corresponding 14 aa peptide in *B. miyamotoi*  
346 was reactive of all samples tested. Although its utility for differential diagnosis is partially  
347 diminished by the inability to distinguish between Lyme disease and BMD sera, we  
348 found this peptide to be potentially highly useful for diagnosis of *Borrelia* infections, both  
349 in early disease (with IgM) or later disease and convalescence (with IgG).

350

351 The majority of immunoreactive epitopes identified in our study were located on Vmps  
352 (32, 50, 51). Vmps have been shown to be key antigens for neutralization in *Borrelia*  
353 *hermsii* (50). Recent studies in mice have shown the potential of Vsps as a possible  
354 target for diagnostic serologic assays for BMD (32). In our study, the majority of reactive  
355 peptides were mapped to the variable portions of Vsps and Vips, but we also identified  
356 reactive regions within the conserved protein fragments. Because of higher degree of aa  
357 conservation, these reactive peptides could have greater utility for BMD diagnosis.

358

359 Our work supports findings from previous studies that reported the C6 ELISA cannot  
360 effectively discriminate between antibodies to *B. burgdorferi* and *B. miyamotoi* (20, 26).  
361 We also demonstrate that the corresponding C6-like peptide in *B. miyamotoi* is the likely  
362 cause of crossreactive signals. Our findings also raise concerns about the specificity of  
363 GlpQ as a diagnostic antigen. Three sera that were positive on the GlpQ ELISA did not  
364 have reactivity with *B. miyamotoi* peptides in the TBD Serochip assay. We cannot  
365 explain the positive commercial ELISA results in the two samples that were negative on  
366 the TBD-Serochip and by LIPS. One ELISA-positive sample had a low positive result by  
367 LIPS but not the TBD-Serochip. We consider it very unlikely that this patient would have  
368 antibodies to *B. miyamotoi* GlpQ but not to any other immunodominant antigens. We  
369 conclude that the positive result may have been due to cross-reacting antibodies.  
370 Although GlpQ is not present in *B. burgdorferi*, this enzyme is present in a wide range of  
371 bacteria, and in some cases, shares substantial aa sequence similarity. For example,  
372 the *Escherichia coli* GlpQ shares 49% aa identity with *B. miyamotoi* GlpQ, and in one 39  
373 aa stretch, 34 aa are identical in the two proteins. Thus, it is plausible that in some  
374 instances, antibodies to GlpQ from other bacteria may react with *B. miyamotoi* GlpQ  
375 ELISA. We suspect that GlpQ specificity may need further examination.

376

377 A limitation of our study is that we analyzed a limited number of specimens with  
378 confirmed BMD. This was due to the fact that BMD diagnosis is rare and results in a  
379 paucity of well-characterized BMD specimens. Also the timing of the convalescent serum  
380 samples post treatment might have impacted our findings. Nevertheless, we observed a  
381 similar pattern of reactivity from all samples and anticipate that we identified the major  
382 reactive *B. miyamotoi* peptides. Although at present the TBD-Serochip is not yet  
383 employed for patient serodiagnosis, these peptides can be ported to other serologic  
384 platforms that are typically used in clinical laboratories. We utilized a similar approach for

385 the development of a diagnostic assay for Zika virus (52). We anticipate that the panel of  
386 peptides we identified in this work can build the foundation of future studies examining  
387 the utility of these epitopes for the specific diagnosis of BMD.

388

### 389 **Acknowledgments**

390 We thank Simon H. Williams for his assistance with the manuscript. We thank Sam  
391 Telford for providing samples.

392 This study was funded with grants from the Steven & Alexandra Cohen Foundation (CF  
393 CU18-2692 and SACF CU15-4008). This research was supported in part by the  
394 Intramural Research Program of the National Institute of Allergy and Infectious Disease,  
395 National Institutes of Health.

396

### 397 **Disclosures:**

398 Drs. Tokarz, Mishra, and Lipkin are listed as inventors in patent application No.  
399 62/848,701, that covers the diagnostic peptides identified on the TBD-Serochip.

400 Dr. Wormser reports receiving research grants from Immunetics, Inc., Institute for  
401 Systems Biology, Rarecyte, Inc., and Quidel Corporation. He owns equity in  
402 Abbott/AbbVie; has been an expert witness in malpractice cases involving Lyme disease  
403 and babesiosis; and is an unpaid board member of the American Lyme Disease  
404 Foundation.

405 Dr. Marques is a coinventor on U.S. patent 8,926,98, which uses the Luciferase  
406 Immunoprecipitation System to evaluate antibody responses to the synthetic VOVO  
407 polypeptide, derived from VlsE and OspC antigens. Dr. Marques is an unpaid scientific  
408 board member of the Global Lyme Alliance and the American Lyme Disease  
409 Foundation.

410



411 **Disclaimer:** The content of this publication does not necessarily reflect the views of or  
412 policies of the Department of Health and Human Services, nor does mention of trade  
413 names, commercial products, or organizations imply endorsement by the U.S.  
414 Government.

415

416

417

418 Figure Legends

419

420 **Figure 1. Identification of reactive epitopes within the conserved region of Vsps.**

421 Panel A displays the alignment of five *B. miyamotoi* Vsp homologs. Regions of homology  
422 are shown in black. The numbers on top of the alignment denote the relative aa position  
423 of each protein relative to Vsp1. The location of the consensus reactive epitope VS-C-1  
424 and its aa sequence are indicated. Panels B and C show IgM reactivity plots of Vsp1  
425 (accession number AGS80212) and Vsp4 (accession number ALU64345), respectively.  
426 Numbers 1 to 7 represent the BMD samples. Reactivity to control sera (from a healthy  
427 individual and various stages of Lyme disease) are shown on the right. The Y axis  
428 represents the location of 12-mer peptides positioned along the contiguous protein  
429 sequence of Vsp1 and Vsp4. Immunoreactivity with the 12-mer peptides is indicated in  
430 green, with darker color corresponding to increasing reactivity. The location of VS-C-1  
431 (samples 2, 4, 5, 6 and 7) and its corresponding 12-mer peptide sequences are  
432 indicated in the bracket on the left in panels B and C.

433

434 **Figure 2. Conservation of the VS-C-1 peptide in *B. miyamotoi*.** Shown is the aa  
435 alignment of all Vsp sequences deposited in Genbank as of June 28, 2019. Accession

436 numbers are indicated on the left. Location of the VS-C-1 peptide is shown in red. The  
437 numbers on top denote the aa position within Vsp1.

438

439 **Figure 3. Vsp diversity and reactivity to the Vsp-C-1 epitope.** Each panel represents  
440 the reactivity of the seven tested sera (labeled 1-7) to the peptides from Vsp homologs  
441 present on the TBD-Serochip. The variant Vsp 12-mer peptide sequences are shown on  
442 the left; accession numbers are indicated on the right. Amino acid differences to the  
443 consensus sequence (based on Vsp1) are displayed in red. Immunoreactivity to the 12-  
444 mer peptides is indicated in green with increasing signal intensity displayed from light to  
445 dark.

446

447 **Figure 4. Locations of major immunogenic linear peptides in Vsp and OspC.** The N  
448 terminal portions of Vsp1 and OspC were aligned to contrast the reactive portions of  
449 OspC (in blue) and Vsp (in red).

450

451 **Figure 5. Identification of reactive peptides within Vlp  $\delta$ .** Shown is the IgM and IgG  
452 reactivity map displaying reactive 12-mer peptides (in green) of Vlp 15/16 (accession  
453 number ALM31565). Numbers 1 through 7 represent the 7 BMD sera. Reactivity to  
454 control sera (healthy individual from a Lyme endemic area and a patient with Lyme  
455 disease at convalescence) are shown on the right. The numbers on the Y-axis represent  
456 the aa location of the 12-mer peptides positioned along the contiguous protein sequence  
457 of Vlp 15/16. Regions with immunoreactive 12-mer peptides are indicated in green with  
458 increasing signal intensity displayed from light to dark. The asterisks indicate major  
459 reactive epitopes; \* Vlp $\delta$ -C-1, \*\* Vlp $\delta$ -C-2, \*\*\* Vlp $\delta$ -V-1, \*\*\*\* C6-like.

460

461 **Figure 6. Identification of reactive peptides within Vlp  $\gamma$ .** Shown is the IgM and IgG  
462 reactivity map displaying reactive 12-mer peptides (in green) of Vlp5 (accession number  
463 AHH06031). Numbers 1 through 7 represent the 7 BMD sera. Reactivity to control sera  
464 (healthy individual from a Lyme endemic area and a patient with Lyme disease at  
465 convalescence) are shown on the right. The numbers on the Y-axis represent the aa  
466 location of the 12-mer peptides positioned along the contiguous protein sequence of Vlp  
467 5. Regions with immunoreactive 12-mer peptides are indicated in green with increasing  
468 signal intensity displayed from light to dark. The asterisks indicate major reactive  
469 epitopes; \* Vlp $\gamma$ -C-3, \*\* Vlp $\gamma$ -V-2, \*\*\* Vlp $\gamma$ -V-1

470

471

472 **Figure 7. Sequence heterogeneity does not impact the reactivity to Vlp $\delta$ -V-1.** Panel  
473 A - alignment of *B. miyamotoi* Vlp homologs with *B. burgdorferi* VlsE. The position of  
474 Vlp $\delta$ -V-1 reactive region is indicated in red, and the *B. burgdorferi* C6 epitope in blue.  
475 Panel B - Signal intensity of the 12-mer peptides representing Vlp $\delta$ -V-1 sequence  
476 variants. \* - maximum intensity.

477

478 **Figure 8. Immunoreactivity comparison of the *B. burgdorferi* C6 and the C6-like**  
479 **peptide of *B. miyamotoi*.** Panel A displays the reactivity maps of the 12-mer peptides  
480 that constitute the 26 aa C6-like region of *B. miyamotoi*. Panel A shows the  
481 corresponding C6 12-mer peptides from *B. burgdorferi*. The individual 12-mer peptides  
482 are indicated on the Y axis. Regions with immunoreactive 12-mer peptides are displayed  
483 in green with increasing signal intensity displayed from light to dark.

484

485 **Figure 9. Reactivity to FlaB.** Reactivity plots from a convalescent-phase Lyme disease  
486 serum (panel A) and BMD serum (Panel B). The reactive regions (in green) are indicated  
487 on the contiguous protein sequence of *B. burgdorferi* (accession number AAB36994-left)  
488 and *B. miyamotoi* (accession number AAT99442-right). Panel C shows a close up of the  
489 primary reactive region, located between 190-220 on both antigens. Panel D displays an  
490 alignment of the primary reactive region, with the *Borrelia* specific epitope indicated in  
491 red.

492

493

494

#### 495 BIBLIOGRAPHY

496

- 497 1. **Platonov AE, Karan LS, Kolyasnikova NM, Makhneva NA, Toporkova MG,**  
498 **Maleev VV, Fish D, Krause PJ.** 2011. Humans infected with relapsing fever  
499 spirochete *Borrelia miyamotoi*, Russia. *Emerg Infect Dis* **17**:1816-1823.
- 500 2. **Sato K, Takano A, Konnai S, Nakao M, Ito T, Koyama K, Kaneko M, Ohnishi**  
501 **M, Kawabata H.** 2014. Human infections with *Borrelia miyamotoi*, Japan. *Emerg*  
502 *Infect Dis* **20**:1391-1393.
- 503 3. **Molloy PJ, Telford SR, 3rd, Chowdri HR, Lepore TJ, Gugliotta JL, Weeks**  
504 **KE, Hewins ME, Goethert HK, Berardi VP.** 2015. *Borrelia miyamotoi* Disease in  
505 the Northeastern United States: A Case Series. *Ann Intern Med* **163**:91-98.
- 506 4. **Cochez C, Heyman P, Heylen D, Fonville M, Hengeveld P, Takken W,**  
507 **Simons L, Sprong H.** 2015. The Presence of *Borrelia miyamotoi*, A Relapsing  
508 Fever Spirochaete, in Questing *Ixodes ricinus* in Belgium and in The  
509 Netherlands. *Zoonoses Public Health* **62**:331-333.

- 510 5. **Kadkhoda K, Dumouchel C, Brancato J, Gretchen A, Krause PJ.** 2017.  
511 Human seroprevalence of *Borrelia miyamotoi* in Manitoba, Canada, in 2011-  
512 2014: a cross-sectional study. *CMAJ Open* **5**:E690-E693.
- 513 6. **Fukunaga M, Takahashi Y, Tsuruta Y, Matsushita O, Ralph D, McClelland M,**  
514 **Nakao M.** 1995. Genetic and phenotypic analysis of *Borrelia miyamotoi* sp. nov.,  
515 isolated from the ixodid tick *Ixodes persulcatus*, the vector for Lyme disease in  
516 Japan. *Int J Syst Bacteriol* **45**:804-810.
- 517 7. **Scoles GA, Papero M, Beati L, Fish D.** 2001. A relapsing fever group  
518 spirochete transmitted by *Ixodes scapularis* ticks. *Vector Borne Zoonotic Dis*  
519 **1**:21-34.
- 520 8. **Mun J, Eisen RJ, Eisen L, Lane RS.** 2006. Detection of a *Borrelia miyamotoi*  
521 sensu lato relapsing-fever group spirochete from *Ixodes pacificus* in California. *J*  
522 *Med Entomol* **43**:120-123.
- 523 9. **Kiewra D, Stanczak J, Richter M.** 2014. *Ixodes ricinus* ticks (Acari, Ixodidae) as  
524 a vector of *Borrelia burgdorferi* sensu lato and *Borrelia miyamotoi* in Lower  
525 Silesia, Poland--preliminary study. *Ticks Tick Borne Dis* **5**:892-897.
- 526 10. **Burgdorfer W, Barbour AG, Hayes SF, Benach JL, Grunwaldt E, Davis JP.**  
527 1982. Lyme disease-a tick-borne spirochetosis? *Science* **216**:1317-1319.
- 528 11. **Tokarz R, Jain K, Bennett A, Briese T, Lipkin WI.** 2010. Assessment of  
529 polymicrobial infections in ticks in New York state. *Vector Borne Zoonotic Dis*  
530 **10**:217-221.
- 531 12. **Lee X, Coyle DR, Johnson DK, Murphy MW, McGeehin MA, Murphy RJ,**  
532 **Raffa KF, Paskewitz SM.** 2014. Prevalence of *Borrelia burgdorferi* and  
533 *Anaplasma phagocytophilum* in *Ixodes scapularis* (Acari: Ixodidae) nymphs  
534 collected in managed red pine forests in Wisconsin. *J Med Entomol* **51**:694-701.

- 535 13. **Venclikova K, Betasova L, Sikutova S, Jedlickova P, Hubalek Z, Rudolf I.**  
536 2014. Human pathogenic borreliae in Ixodes ricinus ticks in natural and urban  
537 ecosystem (Czech Republic). *Acta Parasitol* **59**:717-720.
- 538 14. **Graham CB, Pilgard MA, Maes SE, Hojgaard A, Eisen RJ.** 2016. Paired real-  
539 time PCR assays for detection of *Borrelia miyamotoi* in North American *Ixodes*  
540 *scapularis* and *Ixodes pacificus* (Acari: Ixodidae). *Ticks Tick Borne Dis* **7**:1230-  
541 1235.
- 542 15. **Tokarz R, Tagliafierro T, Cucura DM, Rochlin I, Sameroff S, Lipkin WI.** 2017.  
543 Detection of *Anaplasma phagocytophilum*, *Babesia microti*, *Borrelia burgdorferi*,  
544 *Borrelia miyamotoi*, and Powassan Virus in Ticks by a Multiplex Real-Time  
545 Reverse Transcription-PCR Assay. *mSphere* **2**.
- 546 16. **Oda R, Kutsuna S, Sekikawa Y, Hongo I, Sato K, Ohnishi M, Kawabata H.**  
547 2017. The first case of imported *Borrelia miyamotoi* disease concurrent with  
548 Lyme disease. *J Infect Chemother* **23**:333-335.
- 549 17. **Krause PJ, Fish D, Narasimhan S, Barbour AG.** 2015. *Borrelia miyamotoi*  
550 infection in nature and in humans. *Clin Microbiol Infect* **21**:631-639.
- 551 18. **Telford SR, 3rd, Goethert HK, Molloy PJ, Berardi VP, Chowdri HR, Gugliotta**  
552 **JL, Lepore TJ.** 2015. *Borrelia miyamotoi* Disease: Neither Lyme Disease Nor  
553 Relapsing Fever. *Clin Lab Med* **35**:867-882.
- 554 19. **Wagemakers A, Staarink PJ, Sprong H, Hovius JW.** 2015. *Borrelia miyamotoi*:  
555 a widespread tick-borne relapsing fever spirochete. *Trends Parasitol* **31**:260-269.
- 556 20. **Molloy PJ, Weeks KE, Todd B, Wormser GP.** 2018. Seroreactivity to the C6  
557 Peptide in *Borrelia miyamotoi* Infections Occurring in the Northeastern United  
558 States. *Clin Infect Dis* **66**:1407-1410.
- 559 21. **Wormser GP, Shapiro ED, Fish D.** 2019. *Borrelia miyamotoi*: An Emerging  
560 Tick-Borne Pathogen. *Am J Med* **132**:136-137.

- 561 22. **Nelder MP, Russell CB, Sheehan NJ, Sander B, Moore S, Li Y, Johnson S,**  
562 **Patel SN, Sider D.** 2016. Human pathogens associated with the blacklegged tick  
563 *Ixodes scapularis*: a systematic review. *Parasit Vectors* **9**:265.
- 564 23. **Lommano E, Bertaiola L, Dupasquier C, Gern L.** 2012. Infections and  
565 coinfections of questing *Ixodes ricinus* ticks by emerging zoonotic pathogens in  
566 Western Switzerland. *Appl Environ Microbiol* **78**:4606-4612.
- 567 24. **Diuk-Wasser MA, Vannier E, Krause PJ.** 2016. Coinfection by *Ixodes* Tick-  
568 Borne Pathogens: Ecological, Epidemiological, and Clinical Consequences.  
569 *Trends Parasitol* **32**:30-42.
- 570 25. **Krause PJ, Narasimhan S, Wormser GP, Barbour AG, Platonov AE,**  
571 **Brancato J, Lepore T, Dardick K, Mamula M, Rollend L, Steeves TK, Diuk-**  
572 **Wasser M, Usmani-Brown S, Williamson P, Sarksyian DS, Fikrig E, Fish D,**  
573 **Tick Borne Diseases G.** 2014. *Borrelia miyamotoi* sensu lato seroreactivity and  
574 seroprevalence in the northeastern United States. *Emerg Infect Dis* **20**:1183-  
575 1190.
- 576 26. **Sudhindra P, Wang G, Schriefer ME, McKenna D, Zhuge J, Krause PJ,**  
577 **Marques AR, Wormser GP.** 2016. Insights into *Borrelia miyamotoi* infection from  
578 an untreated case demonstrating relapsing fever, monocytosis and a positive C6  
579 Lyme serology. *Diagn Microbiol Infect Dis* **86**:93-96.
- 580 27. **Jahfari S, Sarksyian DS, Kolyasnikova NM, Hovius JW, Sprong H, Platonov**  
581 **AE.** 2017. Evaluation of a serological test for the diagnosis of *Borrelia miyamotoi*  
582 disease in Europe. *J Microbiol Methods* **136**:11-16.
- 583 28. **Schwan TG, Schrumpp ME, Hinnebusch BJ, Anderson DE, Jr., Konkel ME.**  
584 1996. GlpQ: an antigen for serological discrimination between relapsing fever  
585 and Lyme borreliosis. *J Clin Microbiol* **34**:2483-2492.

- 586 29. **Halperin T, Orr N, Cohen R, Hasin T, Davidovitch N, Klement E, Kayouf R,**  
587 **Baneth G, Cohen D, Yavzori M.** 2006. Detection of relapsing fever in human  
588 blood samples from Israel using PCR targeting the glycerophosphodiester  
589 phosphodiesterase (GlpQ) gene. *Acta Trop* **98**:189-195.
- 590 30. **Bacon RM, Pilgard MA, Johnson BJ, Raffel SJ, Schwan TG.** 2004.  
591 Glycerophosphodiester phosphodiesterase gene (glpQ) of *Borrelia lonestari*  
592 identified as a target for differentiating *Borrelia* species associated with hard ticks  
593 (*Acari:Ixodidae*). *J Clin Microbiol* **42**:2326-2328.
- 594 31. **Hamase A, Takahashi Y, Nohgi K, Fukunaga M.** 1996. Homology of variable  
595 major protein genes between *Borrelia hermsii* and *Borrelia miyamotoi*. *FEMS*  
596 *Microbiol Lett* **140**:131-137.
- 597 32. **Wagemakers A, Koetsveld J, Narasimhan S, Wickel M, Deponte K,**  
598 **Bleijlevens B, Jahfari S, Sprong H, Karan LS, Sarksyan DS, van der Poll T,**  
599 **Bockenstedt LK, Bins AD, Platonov AE, Fikrig E, Hovius JW.** 2016. Variable  
600 Major Proteins as Targets for Specific Antibodies against *Borrelia miyamotoi*. *J*  
601 *Immunol* **196**:4185-4195.
- 602 33. **Stone BL, Brissette CA.** 2017. Host Immune Evasion by Lyme and Relapsing  
603 Fever *Borreliae*: Findings to Lead Future Studies for *Borrelia miyamotoi*. *Front*  
604 *Immunol* **8**:12.
- 605 34. **Barbour AG, Restrepo BI.** 2000. Antigenic variation in vector-borne pathogens.  
606 *Emerg Infect Dis* **6**:449-457.
- 607 35. **Hayes LJ, Wright DJ, Archard LC.** 1988. Segmented arrangement of *Borrelia*  
608 *duttonii* DNA and location of variant surface antigen genes. *J Gen Microbiol*  
609 **134**:1785-1793.
- 610 36. **Barbour AG.** 1990. Antigenic variation of a relapsing fever *Borrelia* species.  
611 *Annu Rev Microbiol* **44**:155-171.



- 612 37. **Carter CJ, Bergstrom S, Norris SJ, Barbour AG.** 1994. A family of surface-  
613 exposed proteins of 20 kilodaltons in the genus *Borrelia*. *Infect Immun* **62**:2792-  
614 2799.
- 615 38. **Barbour AG.** 2016. Multiple and Diverse vsp and vlp Sequences in *Borrelia*  
616 *miyamotoi*, a Hard Tick-Borne Zoonotic Pathogen. *PLoS One* **11**:e0146283.
- 617 39. **Cadavid D, Pennington PM, Kerentseva TA, Bergstrom S, Barbour AG.**  
618 1997. Immunologic and genetic analyses of VmpA of a neurotropic strain of  
619 *Borrelia turicatae*. *Infect Immun* **65**:3352-3360.
- 620 40. **Tokarz R, Mishra N, Tagliafierro T, Sameroff S, Caciula A, Chauhan L, Patel**  
621 **J, Sullivan E, Gucwa A, Fallon B, Golightly M, Molins C, Schriefer M,**  
622 **Marques A, Briese T, Lipkin WI.** 2018. A multiplex serologic platform for  
623 diagnosis of tick-borne diseases. *Sci Rep* **8**:3158.
- 624 41. **Kumru OS, Schulze RJ, Rodnin MV, Ladokhin AS, Zuckert WR.** 2011.  
625 Surface localization determinants of *Borrelia* OspC/Vsp family lipoproteins. *J*  
626 *Bacteriol* **193**:2814-2825.
- 627 42. **Zuckert WR, Kerentseva TA, Lawson CL, Barbour AG.** 2001. Structural  
628 conservation of neurotropism-associated VspA within the variable *Borrelia* Vsp-  
629 OspC lipoprotein family. *J Biol Chem* **276**:457-463.
- 630 43. **Barbour AG, Hayes SF, Heiland RA, Schrupf ME, Tessier SL.** 1986. A  
631 *Borrelia*-specific monoclonal antibody binds to a flagellar epitope. *Infect Immun*  
632 **52**:549-554.
- 633 44. **Dressler F, Whalen JA, Reinhardt BN, Steere AC.** 1993. Western blotting in  
634 the serodiagnosis of Lyme disease. *J Infect Dis* **167**:392-400.
- 635 45. **Luft BJ, Dunn JJ, Dattwyler RJ, Gorgone G, Gorevic PD, Schubach WH.**  
636 1993. Cross-reactive antigenic domains of the flagellin protein of *Borrelia*  
637 *burgdorferi*. *Res Microbiol* **144**:251-257.

- 638 46. **Moore A, Nelson C, Molins C, Mead P, Schriefer M.** 2016. Current Guidelines,  
639 Common Clinical Pitfalls, and Future Directions for Laboratory Diagnosis of Lyme  
640 Disease, United States. *Emerg Infect Dis* **22**.
- 641 47. **Marques AR.** 2015. Laboratory diagnosis of Lyme disease: advances and  
642 challenges. *Infect Dis Clin North Am* **29**:295-307.
- 643 48. **Biggs HM, Behravesh CB, Bradley KK, Dahlgren FS, Drexler NA, Dumler JS,**  
644 **Folk SM, Kato CY, Lash RR, Levin ML, Massung RF, Nadelman RB,**  
645 **Nicholson WL, Paddock CD, Pritt BS, Traeger MS.** 2016. Diagnosis and  
646 Management of Tickborne Rickettsial Diseases: Rocky Mountain Spotted Fever  
647 and Other Spotted Fever Group Rickettsioses, Ehrlichioses, and Anaplasmosis -  
648 United States. *MMWR Recomm Rep* **65**:1-44.
- 649 49. **Krause PJ, Carroll M, Fedorova N, Brancato J, Dumouchel C, Akosa F,**  
650 **Narasimhan S, Fikrig E, Lane RS.** 2018. Human *Borrelia miyamotoi* infection in  
651 California: Serodiagnosis is complicated by multiple endemic *Borrelia* species.  
652 *PLoS One* **13**:e0191725.
- 653 50. **Barbour AG, Bundoc V.** 2001. In vitro and in vivo neutralization of the relapsing  
654 fever agent *Borrelia hermsii* with serotype-specific immunoglobulin M antibodies.  
655 *Infect Immun* **69**:1009-1015.
- 656 51. **Connolly SE, Benach JL.** 2001. Cutting edge: the spirochetemia of murine  
657 relapsing fever is cleared by complement-independent bactericidal antibodies. *J*  
658 *Immunol* **167**:3029-3032.
- 659 52. **Mishra N, Caciula A, Price A, Thakkar R, Ng J, Chauhan LV, Jain K, Che X,**  
660 **Espinosa DA, Montoya Cruz M, Balmaseda A, Sullivan EH, Patel JJ, Jarman**  
661 **RG, Rakeman JL, Egan CT, Reusken C, Koopmans MPG, Harris E, Tokarz**  
662 **R, Briese T, Lipkin WI.** 2018. Diagnosis of Zika Virus Infection by Peptide Array  
663 and Enzyme-Linked Immunosorbent Assay. *MBio* **9**.

664

665

666

Table 1. List of *B. miyamotoi* sequences used to design 12-mer peptides for the TBD-Serochip

| Vmp antigens                                                                                                                                                                                                                                                                                                                                                                                                                                                                                                                                                                                                                                      | Non-Vmp antigens                                                                                                                                                                                                                                                                                                                                                                                                                                                                                                                                                                                                                                                                                                                                                                                                                                                                                                                                   |
|---------------------------------------------------------------------------------------------------------------------------------------------------------------------------------------------------------------------------------------------------------------------------------------------------------------------------------------------------------------------------------------------------------------------------------------------------------------------------------------------------------------------------------------------------------------------------------------------------------------------------------------------------|----------------------------------------------------------------------------------------------------------------------------------------------------------------------------------------------------------------------------------------------------------------------------------------------------------------------------------------------------------------------------------------------------------------------------------------------------------------------------------------------------------------------------------------------------------------------------------------------------------------------------------------------------------------------------------------------------------------------------------------------------------------------------------------------------------------------------------------------------------------------------------------------------------------------------------------------------|
| <p><b>Vsps</b><br/> <b>13 complete:</b> AGS80212, AHH0975, AHH0976, AHH05982, AHH06030, AJA67245, ALM21566, ALN43422, ALN43425, ALU64345, ALZ4557, WP_02444404, WP_044003917<br/> <b>4 partial:</b> AHH05655, WP_025444233, WP_025444484, WP_025444486</p>                                                                                                                                                                                                                                                                                                                                                                                        | <p><b>GlpQ:</b> ACT35309, AHM02192, AIK22387, ALU84911, ALU84913, WP_0209954631, WP_0254443886<br/> <b>FhbA:</b> AGS80215, WP_025444356<br/> <b>ipA:</b> WP_025444145, WP_025444146<br/> <b>P66:</b> AAC09059, AAC09061, AAC09063, ACC09064, AAR17598, AAV52738, AAV52742, AAV52744, AHH04809, AHH04811, WP_002557191, WP_002658111, WP_002662685, WP_002665258, WP_020954965, WP_024705620, WP_031541601, WP_031557381<br/> <b>OppA2:</b> ACC46283, ACC34274, ADQ44805, AHH05084, WP_020954717, WP_020954718<br/> <b>FigG:</b> AGT27718, WP_020954670, WP_020955136, WP_02443450, WP_02443451, WP_043867901<br/> <b>FlaB:</b> AAB37005, AAL99374, AAR00324, AAT99442, AGC773382, AMB26827, ACO38653, AHI10982, AIK22386, AML32120, ACP11868, BAS29553, CAA49308, CAA49322, CAA49315, CAA49318, CAA34735, CAA4931, CAA53011, CAT00959, CAT00959, CAT00967, NP_212282, WP_002556748, WP_020954538, WP_020954528,<br/> <b>FliL:</b> WP_020954670</p> |
| <p><b>Vlps</b><br/> <b>33 complete:</b> AGS80213, AHH05904, ALM13565, ALM31567-ALM31568, ALN43424, ALU64347-ALU64349, ALU64350-ALU64352, ALZ45558, AHH05899, AHH06031, WP_02444234-WP_025444237, WP_025444399-WP_02444401, WP_02444405, WP_025444408, WP_025444446, WP_025444448, WP_025444450-WP_025444452, WP_025444482-WP_04403984, WP_051480340<br/> <b>26 partial:</b> AGS80214, AHH05967, ALN43420, ALN43421, ALN43423, ALU64346, ALZ45552, AMW90882, AHH05648, AHH05649, AHH05654, AHH05892, AHH05998, AHHH05903, AHHH05905, AHH05966, AHH05968, AHH05969, AHH05976, AHH05977, AHH05979-AHH05981, AHH06035, WP_051480326, WP_051480341</p> |                                                                                                                                                                                                                                                                                                                                                                                                                                                                                                                                                                                                                                                                                                                                                                                                                                                                                                                                                    |

Table 2. BMD samples tested on the TBD-Serochip

| Samples | BMD Diagnosis (acute stage)    |
|---------|--------------------------------|
| BMD-1   | PCR                            |
| BMD-2   | PCR                            |
| BMD-3*  | PCR                            |
| BMD-4   | PCR                            |
| BMD-5*  | PCR                            |
| BMD-6   | PCR and GlpQ ELISA (IgM & IgG) |
| BMD-7   | GlpQ ELISA (IgM & IgG)         |

\*previous diagnosis of Lyme disease

**Table 3.** Major immunoreactive linear regions of *B. miyamotoi* Vmps identified with the TBD-Serochip.

| ANTIGEN      | EPITOPE DESIGNATION | EPITOPE SEQUENCE       | COORDINATES | ACCESSION NUMBER | POSITIVE SERA       |          |
|--------------|---------------------|------------------------|-------------|------------------|---------------------|----------|
| Vsp1         | VS-C-1              | SKKIKDAVEFAANVKE       | 52-66       | AGS80212         | 2, 4, 5, 6, 7       | IgM      |
| Vsp          | VS-C-2              | SKKIKDASELMESVKE       | 49-64       | BAA11304         | 4, 5, 6, 7          | IgM      |
| Vsp          | VS-C-3              | IGKKIKNADELDTVAD       | 81-96       | WP025444465      | 2, 3, 4, 5, 7       | IgM      |
| Vsp2         | VS-C-4              | DGTLDTLNNKNGSLL        | 85-88       | ALM31566         | 2, 5, 6, 7          | IgM      |
| Vsp3         | VS-V-1              | ASKAFIDKVKGENASLG      | 115-131     | ALN43425         | 2, 5, 6             | IgM      |
| Vsp4         | VS-V-2              | TKLEVLEKTAEISNELNGK    | 104-122     | ALU64345         | 2, 4, 5             | IgM      |
| Vsp6S        | VS-V-3              | ASKAFIDKVKGENASLG      | 128-144     | ALZ45557         | 2, 5, 6             | IgM      |
| Vsp          | VS-V-4              | DKSSDLGKNDVKDTDAKSAILT | 128-149     | WP025444486      | 3, 4, 5             | IgM      |
| Vlp $\delta$ | Vlp $\delta$ -C-1   | GCNNGGGEDPQKFLTSI      | 8-24        | ALM31565         | 1, 2, 3, 4, 5, 6, 7 | IgM, IgG |
| Vlp $\delta$ | Vlp $\delta$ -C-2   | KAETKKEDIGKYFADIEKTMTL | 51-60       | ALM31565         | 2, 3, 4, 6, 7       | IgM, IgG |
| Vlp $\delta$ | Vlp $\delta$ -V-1   | TDGIEKAKDAAEIAIAPAV    | 222-240     | ALM31565         | 1, 2, 3, 4, 5, 6, 7 | IgM, IgG |
| Vlp $\gamma$ | Vlp $\gamma$ -C-3   | NSNTKKSDVGVYFKKV       | 47-62       | AHH06031         | 1, 2, 5             | IgM, IgG |
| Vlp $\gamma$ | Vlp $\gamma$ -V-2   | LKEGKHDAGDDKKASDG      | 155-171     | AHH06031         | 2, 4, 5, 7          | IgM, IgG |
| Vlp $\gamma$ | Vlp $\gamma$ -V-1   | VTGADILQAIVKDNGE       | 214-229     | AHH06031         | 2, 4, 5, 6, 7       | IgM, IgG |
| Vlp $\alpha$ | Vlp $\alpha$ -C2    | KTTTTKNDVGVYFNSLG      | 72-77       | AGS80213         | 2, 5, 7             | IgM, IgG |
| Vlp $\alpha$ | Vlp $\alpha$ -V1    | LKFAKGGSDAHLNSAN       | 257-262     | AGS80213         | 2, 5, 7             | IgM, IgG |

**Table 4.** Reactivity of the C6 peptides in *B. burgdorferi* and *B. miyamotoi*

| BMD samples | Prior Lyme disease | Reactivity           |                   |          |                                  |
|-------------|--------------------|----------------------|-------------------|----------|----------------------------------|
|             |                    | TBD-Serochip         |                   | C6 ELISA | Cross reactivity on the C6 ELISA |
|             |                    | B. miyamotoi C6-like | B. burgdorferi C6 |          |                                  |
| 1           | -                  | -                    | -                 | -        | -                                |
| 2           | +                  | +                    | +                 | +        | +                                |
| 3           | -                  | -                    | +                 | +        | -                                |
| 4           | -                  | -                    | -                 | -        | -                                |
| 5           | +                  | +                    | +                 | +        | -                                |
| 6           | -                  | +                    | +                 | +        | +                                |
| 7           | -                  | +                    | +                 | +        | +                                |

+ indicates reactivity to the 12-mer peptides within the C6 or C6-like region

Figure 1

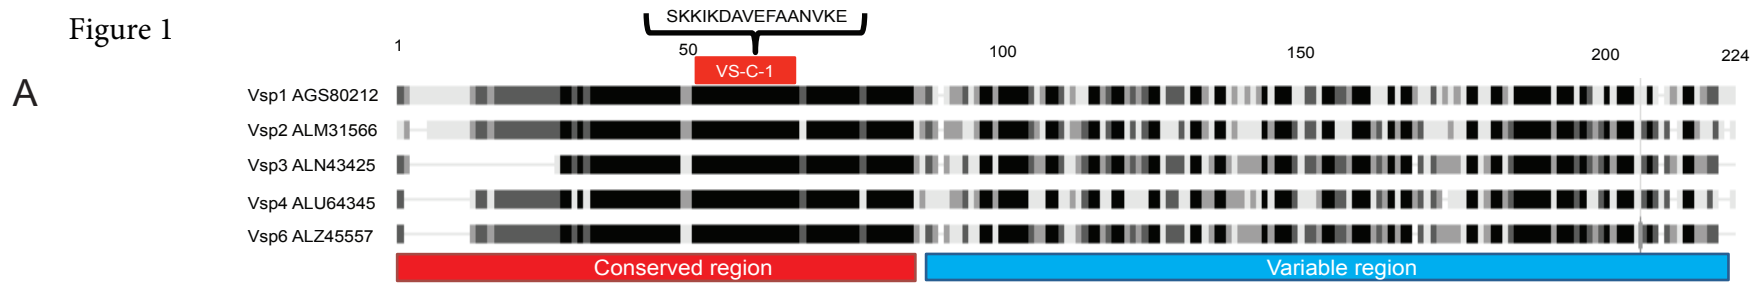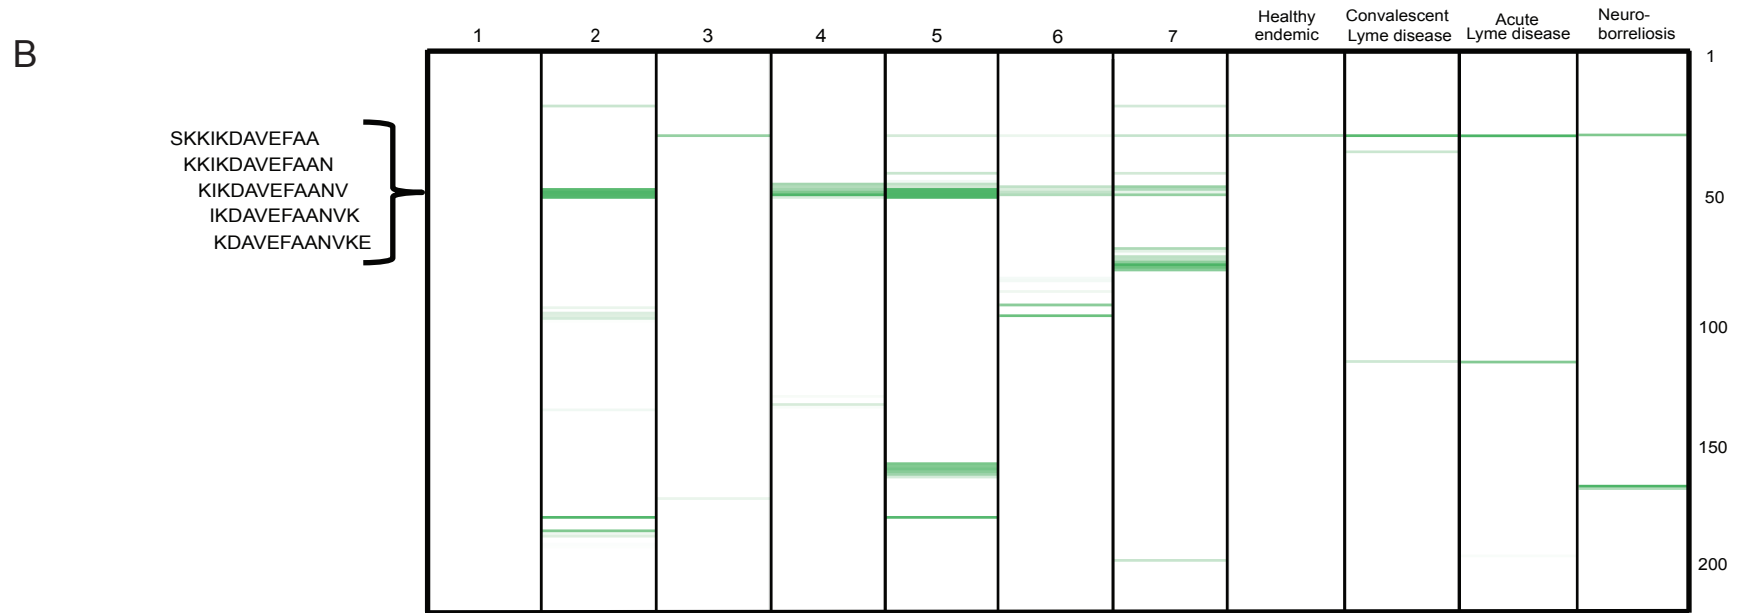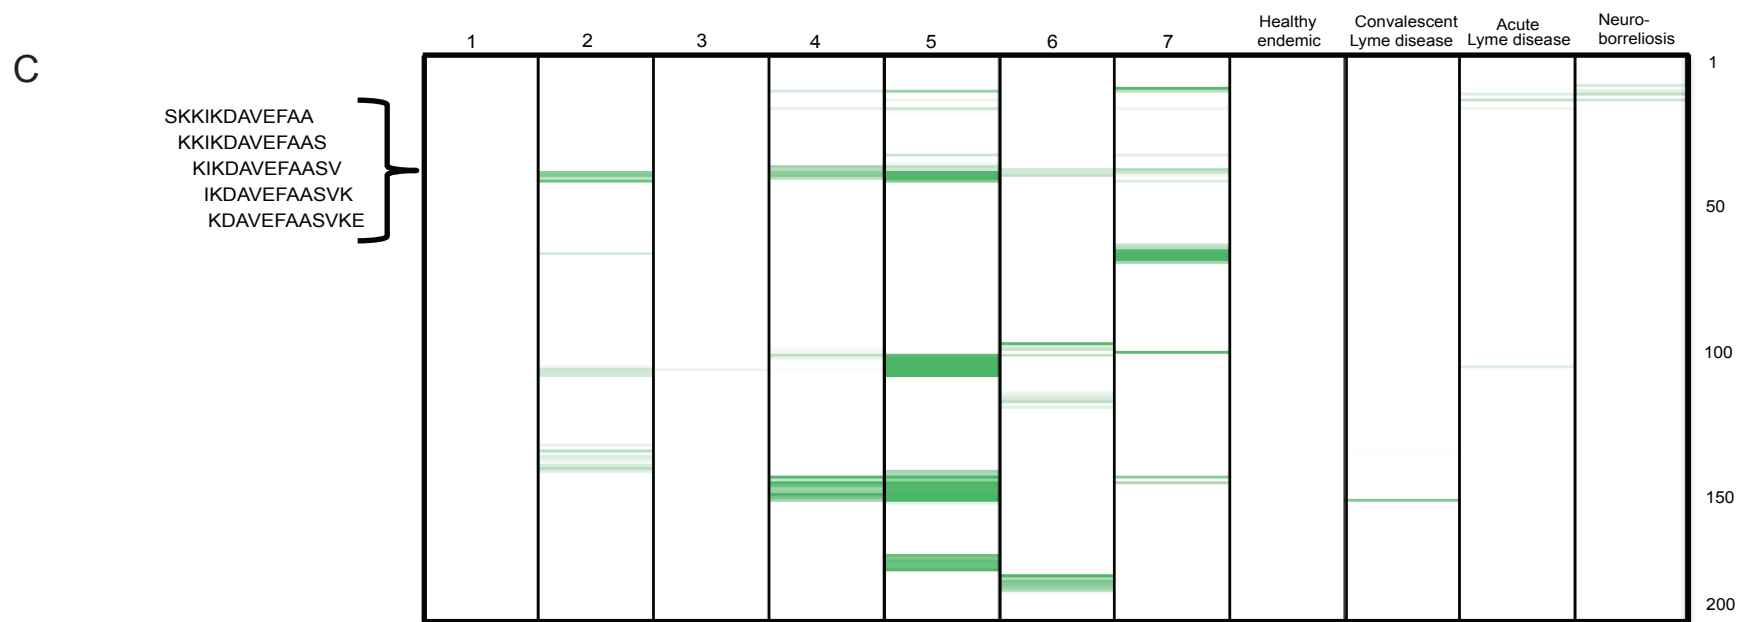



Figure 2

39

VS-C-1

72

Consensus

1. AGS80212
2. AOW96283
3. WP\_056933024
4. WP\_070401573
5. ALN43422
6. ALU64345
7. WP\_099591043
8. AHH05786
9. AHH05982
10. WP\_025444328
11. WP\_025444486
12. WP\_051480345
13. WP\_099497249
14. WP\_099498348
15. WP\_099528617
16. WP\_025444484
17. WP\_099497297
18. WP\_099528519
19. WP\_099528536
20. WP\_099528604
21. ALM31566
22. ALN43425
23. ALZ45557
24. WP\_025444465
25. WP\_044003917
26. WP\_056933028
27. WP\_099591045
28. AHH06030
29. AXV43837
30. WP\_070401561
31. WP\_084821564
32. WP\_099528539
33. WP\_099591051
34. WP\_132987282
35. WP\_099498352
36. WP\_133263981
37. AHH05975
38. QBK64105
39. WP\_133007769
40. WP\_070401567
41. WP\_099591041
42. WP\_025444404
43. AHH05900
44. WP\_099528611
45. BAA11304

|   |   |   |   |   |   |   |   |   |   |   |   |   |   |   |   |   |   |   |   |   |   |   |   |   |   |   |   |   |   |   |   |   |   |
|---|---|---|---|---|---|---|---|---|---|---|---|---|---|---|---|---|---|---|---|---|---|---|---|---|---|---|---|---|---|---|---|---|---|
| K | A | D | G | T | V | I | D | L | V | K | V | S | K | K | I | K | D | A | V | E | F | A | A | S | V | K | E | V | E | T | L | V | K |
| K | A | D | G | T | V | V | D | L | V | K | V | S | K | K | I | K | D | A | V | E | F | A | A | N | V | K | E | V | E | T | L | V | K |
| K | A | D | G | T | V | V | D | L | V | K | V | S | K | K | I | K | D | A | V | E | F | A | A | N | V | K | E | V | E | T | L | V | K |
| K | A | D | G | T | V | V | D | L | V | K | V | S | K | K | I | K | D | A | V | E | F | A | A | N | V | K | E | V | E | T | L | V | K |
| K | A | D | G | T | V | I | D | L | V | K | V | S | K | K | I | K | D | A | V | E | F | A | A | N | V | K | E | V | E | T | L | V | K |
| K | A | D | G | T | V | I | D | L | V | K | V | S | K | K | I | K | D | A | V | E | F | A | A | S | V | K | E | V | E | T | L | V | K |
| K | A | D | G | T | V | I | D | L | V | K | V | S | K | K | I | K | D | A | V | E | F | A | A | S | V | K | E | V | E | T | L | V | K |
| K | A | D | G | T | V | I | D | L | S | K | V | S | K | K | I | K | D | A | V | E | F | A | A | S | V | K | E | V | E | T | L | V | K |
| K | A | D | G | T | V | I | D | L | V | K | V | S | K | K | I | K | D | A | V | E | F | A | A | S | V | K | E | I | E | T | L | V | K |
| K | A | D | G | T | V | I | D | L | S | K | V | S | K | K | I | K | D | A | V | E | F | A | A | S | V | K | E | V | E | T | L | V | K |
| K | A | D | G | T | V | I | D | L | V | K | V | S | K | K | I | K | D | A | V | E | F | A | T | S | V | K | E | V | E | T | L | V | K |
| K | A | D | G | T | V | I | D | L | V | K | V | S | K | K | I | K | D | A | V | E | F | A | A | S | V | K | E | I | E | T | L | V | K |
| K | A | D | G | T | V | I | D | L | V | K | V | S | K | K | I | K | D | A | V | E | F | A | A | S | V | K | E | I | E | T | L | V | K |
| K | A | D | G | T | V | I | D | L | V | K | V | S | K | K | I | K | D | A | V | E | F | A | T | S | V | K | E | V | E | T | L | V | K |
| K | A | D | G | T | V | I | D | L | V | K | V | S | K | K | I | K | D | A | V | E | F | A | A | S | V | K | E | V | E | T | L | V | K |
| K | A | D | G | T | V | I | D | L | A | K | I | S | K | K | I | K | D | A | V | E | F | A | A | S | V | K | E | V | E | T | L | V | K |
| K | A | D | G | T | V | I | D | L | A | K | I | S | K | K | I | K | D | A | V | E | F | A | A | S | V | K | E | V | E | T | L | V | K |
| K | A | D | G | T | V | I | D | L | A | K | V | S | K | K | I | K | D | A | V | E | F | A | A | S | V | K | E | V | H | T | L | V | K |
| K | A | D | G | T | V | I | D | L | A | K | V | S | K | K | I | K | D | A | V | E | F | A | A | S | V | K | E | V | H | T | L | V | K |
| K | A | D | G | T | V | I | D | L | V | K | V | S | K | K | I | K | D | A | V | E | F | A | T | S | V | K | E | I | E | T | L | V | K |
| K | A | D | G | T | V | I | D | L | V | K | V | S | K | K | I | K | D | A | V | E | F | A | T | S | V | K | E | I | E | T | L | V | K |
| K | A | D | G | T | V | I | D | L | A | K | I | S | K | K | I | K | D | A | V | E | F | A | A | S | V | K | E | V | E | T | L | V | K |
| K | A | D | G | T | V | I | D | L | A | K | I | S | K | K | I | K | D | A | V | E | F | A | A | S | V | K | E | V | E | T | L | V | K |
| K | A | D | G | T | V | I | D | L | A | K | V | S | K | K | I | K | D | A | V | E | F | A | A | S | V | K | E | V | H | T | L | V | K |
| K | A | D | G | T | V | I | D | L | A | K | V | S | K | K | I | K | D | A | V | E | F | A | A | S | V | K | E | V | H | T | L | V | K |
| K | A | D | G | T | V | I | D | L | V | K | V | S | K | K | I | K | D | A | V | E | F | A | T | S | V | K | E | I | E | T | L | V | K |
| K | A | D | G | T | V | I | D | L | V | K | V | S | K | K | I | K | D | A | V | E | F | A | T | S | V | K | E | I | E | T | L | V | K |
| K | A | D | G | T | V | I | D | L | V | K | V | S | K | K | I | K | D | A | V | E | F | A | A | S | V | K | E | V | H | T | L | V | R |
| K | A | D | G | T | V | I | D | L | K | A | V | S | K | K | I | K | D | A | V | E | F | A | A | S | V | K | E | V | H | T | L | V | R |
| K | A | D | G | T | V | I | D | L | A | K | V | S | K | K | I | K | D | M | V | E | F | A | A | S | V | K | E | I | E | I | L | V | K |
| K | A | D | G | T | V | I | D | L | V | K | V | S | K | K | I | K | D | A | V | E | F | A | A | S | V | K | E | V | E | T | L | I | K |
| K | A | D | G | T | V | I | D | L | K | T | V | S | K | K | I | K | D | A | V | D | F | A | T | S | V | K | E | V | E | T | L | V | K |
| K | A | D | G | T | V | I | D | L | K | T | V | S | K | K | I | K | D | A | V | D | F | A | T | S | V | K | E | V | E | T | L | V | K |
| K | A | D | G | T | V | I | D | L | A | K | V | S | K | K | I | K | D | V | E | F | A | T | S | V | K | E | I | H | T | L | V | K |   |
| K | A | D | G | T | E | I | D | L | V | K | I | S | K | K | I | K | D | A | V | D | F | A | A | S | V | K | E | V | H | T | V | V | K |
| K | A | D | G | T | V | I | D | L | A | K | V | S | K | N | I | R | D | V | V | E | F | A | A | S | V | K | E | V | H | T | L | I | K |
| K | A | D | G | T | V | I | D | L | A | K | V | S | K | K | I | K | D | V | V | E | F | A | T | S | V | K | V | I | H | T | L | V | K |
| - | - | D | G | T | V | I | D | L | A | K | V | S | K | N | I | R | D | V | V | E | F | A | A | S | V | K | E | V | H | T | L | I | K |
| K | S | D | G | T | V | I | D | L | V | K | V | S | K | K | I | K | D | V | E | F | A | E | G | V | K | E | V | H | T | L | V | K |   |
| K | A | D | G | T | V | I | D | L | A | K | V | S | E | K | I | K | N | A | I | A | F | A | E | G | I | K | E | V | E | T | L | I | K |
| K | A | D | G | T | V | I | D | L | A | K | V | S | K | K | I | K | D | A | S | E | L | M | E | S | V | K | E | V | E | T | L | V | K |
| K | A | D | G | T | V | I | D | L | A | K | V | S | K | K | I | K | D | A | S | E | L | M | E | S | V | K | E | V | E | T | L | V | K |
| K | A | D | G | T | V | I | D | L | A | K | V | S | K | K | I | K | D | A | S | E | L | M | E | S | V | K | E | V | E | T | L | V | K |
| K | A | D | G | T | V | I | D | L | A | K | V | S | K | K | I | K | D | A | S | E | L | M | E | S | V | K | E | V | E | T | L | V | K |
| K | A | D | G | T | V | I | D | L | A | K | V | S | K | K | I | K | D | A | S | E | L | M | E | S | V | K | E | V | E | T | L | V | K |

Figure 3

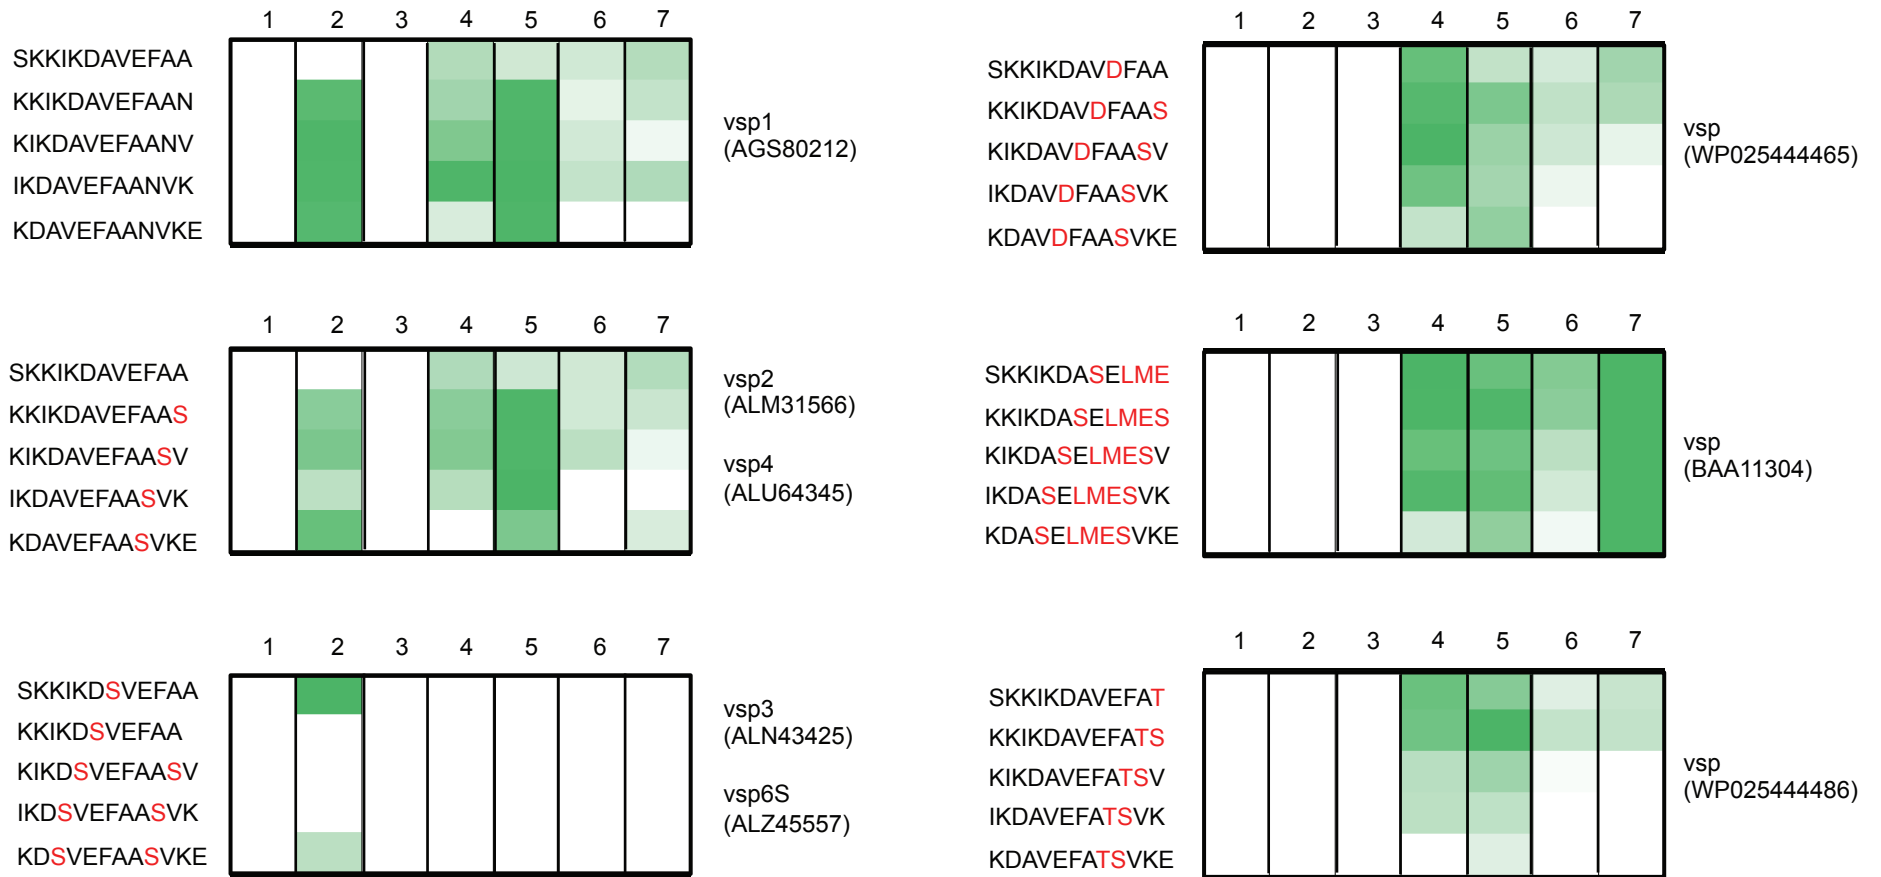

Figure 4

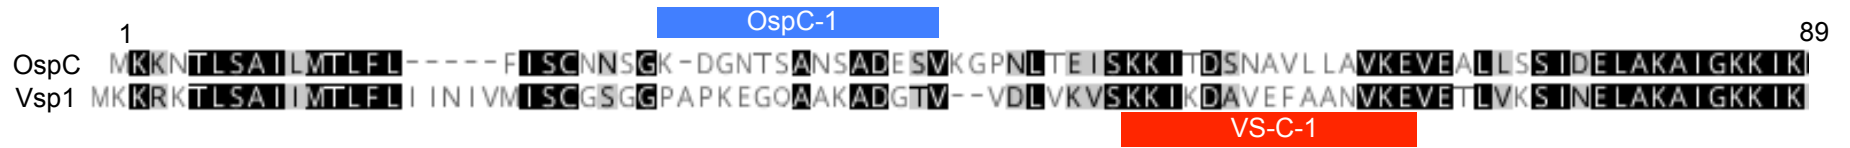

Figure 5

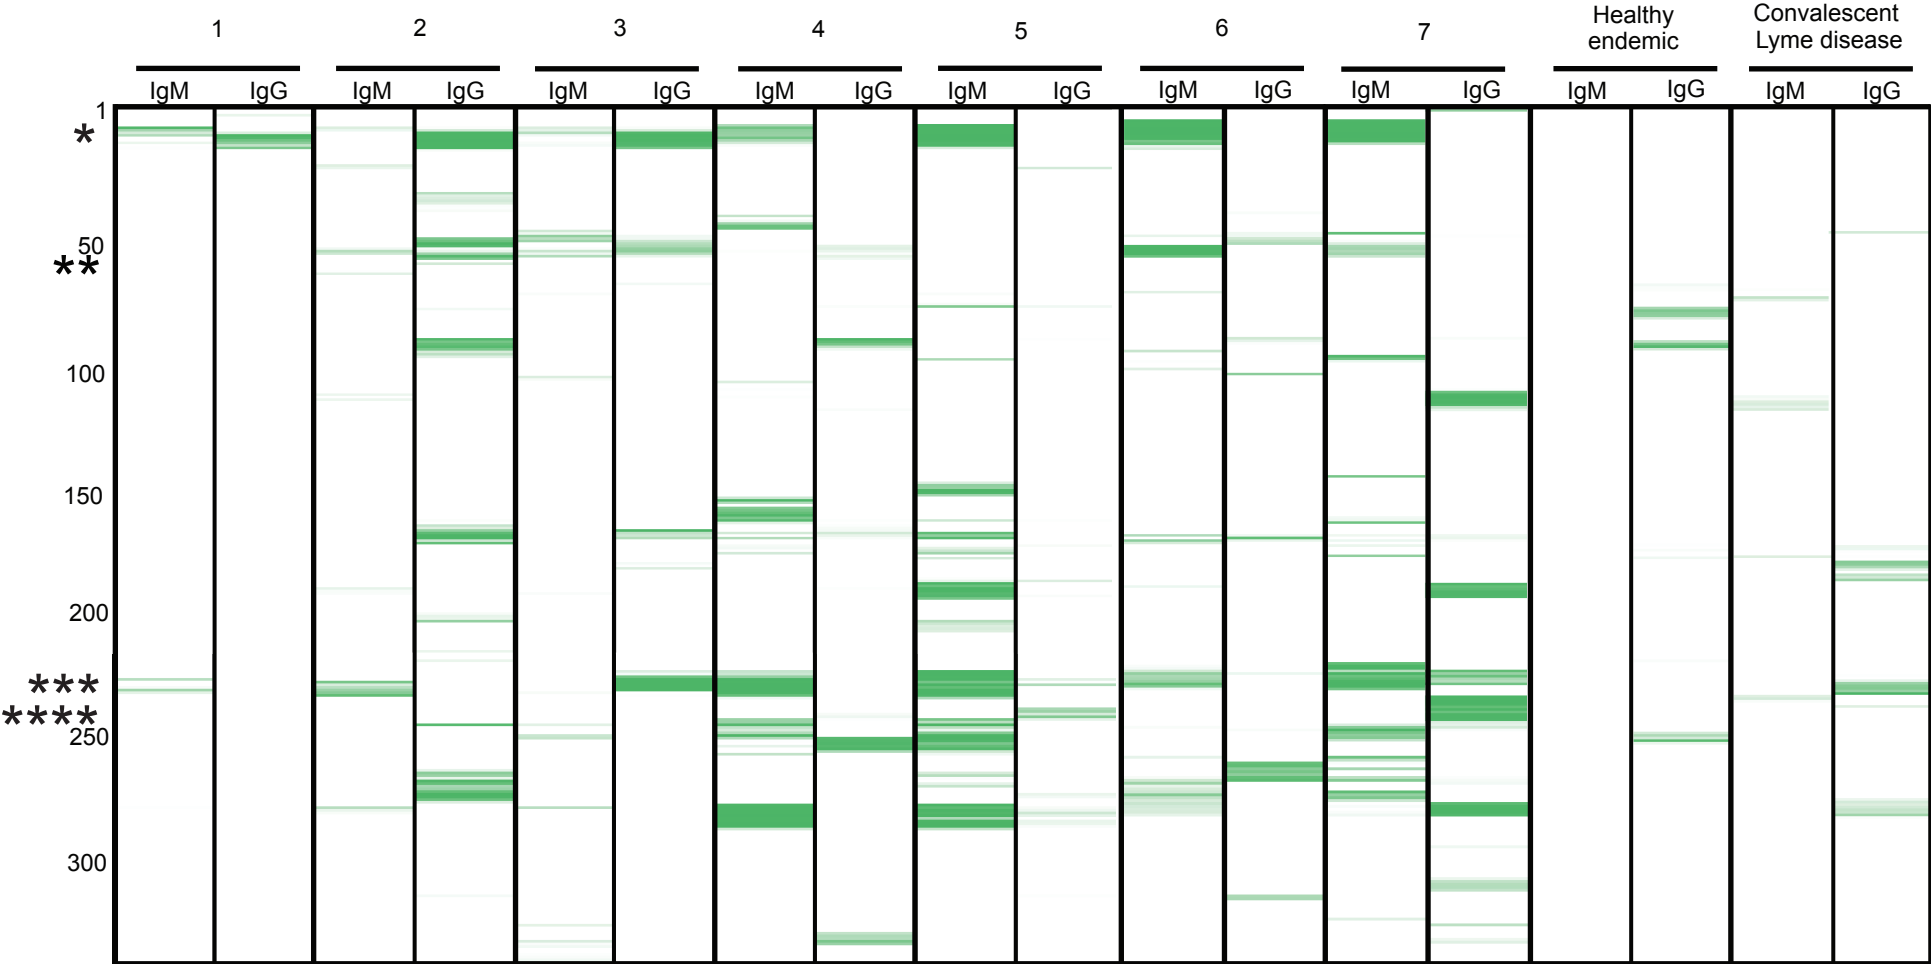

Figure 6

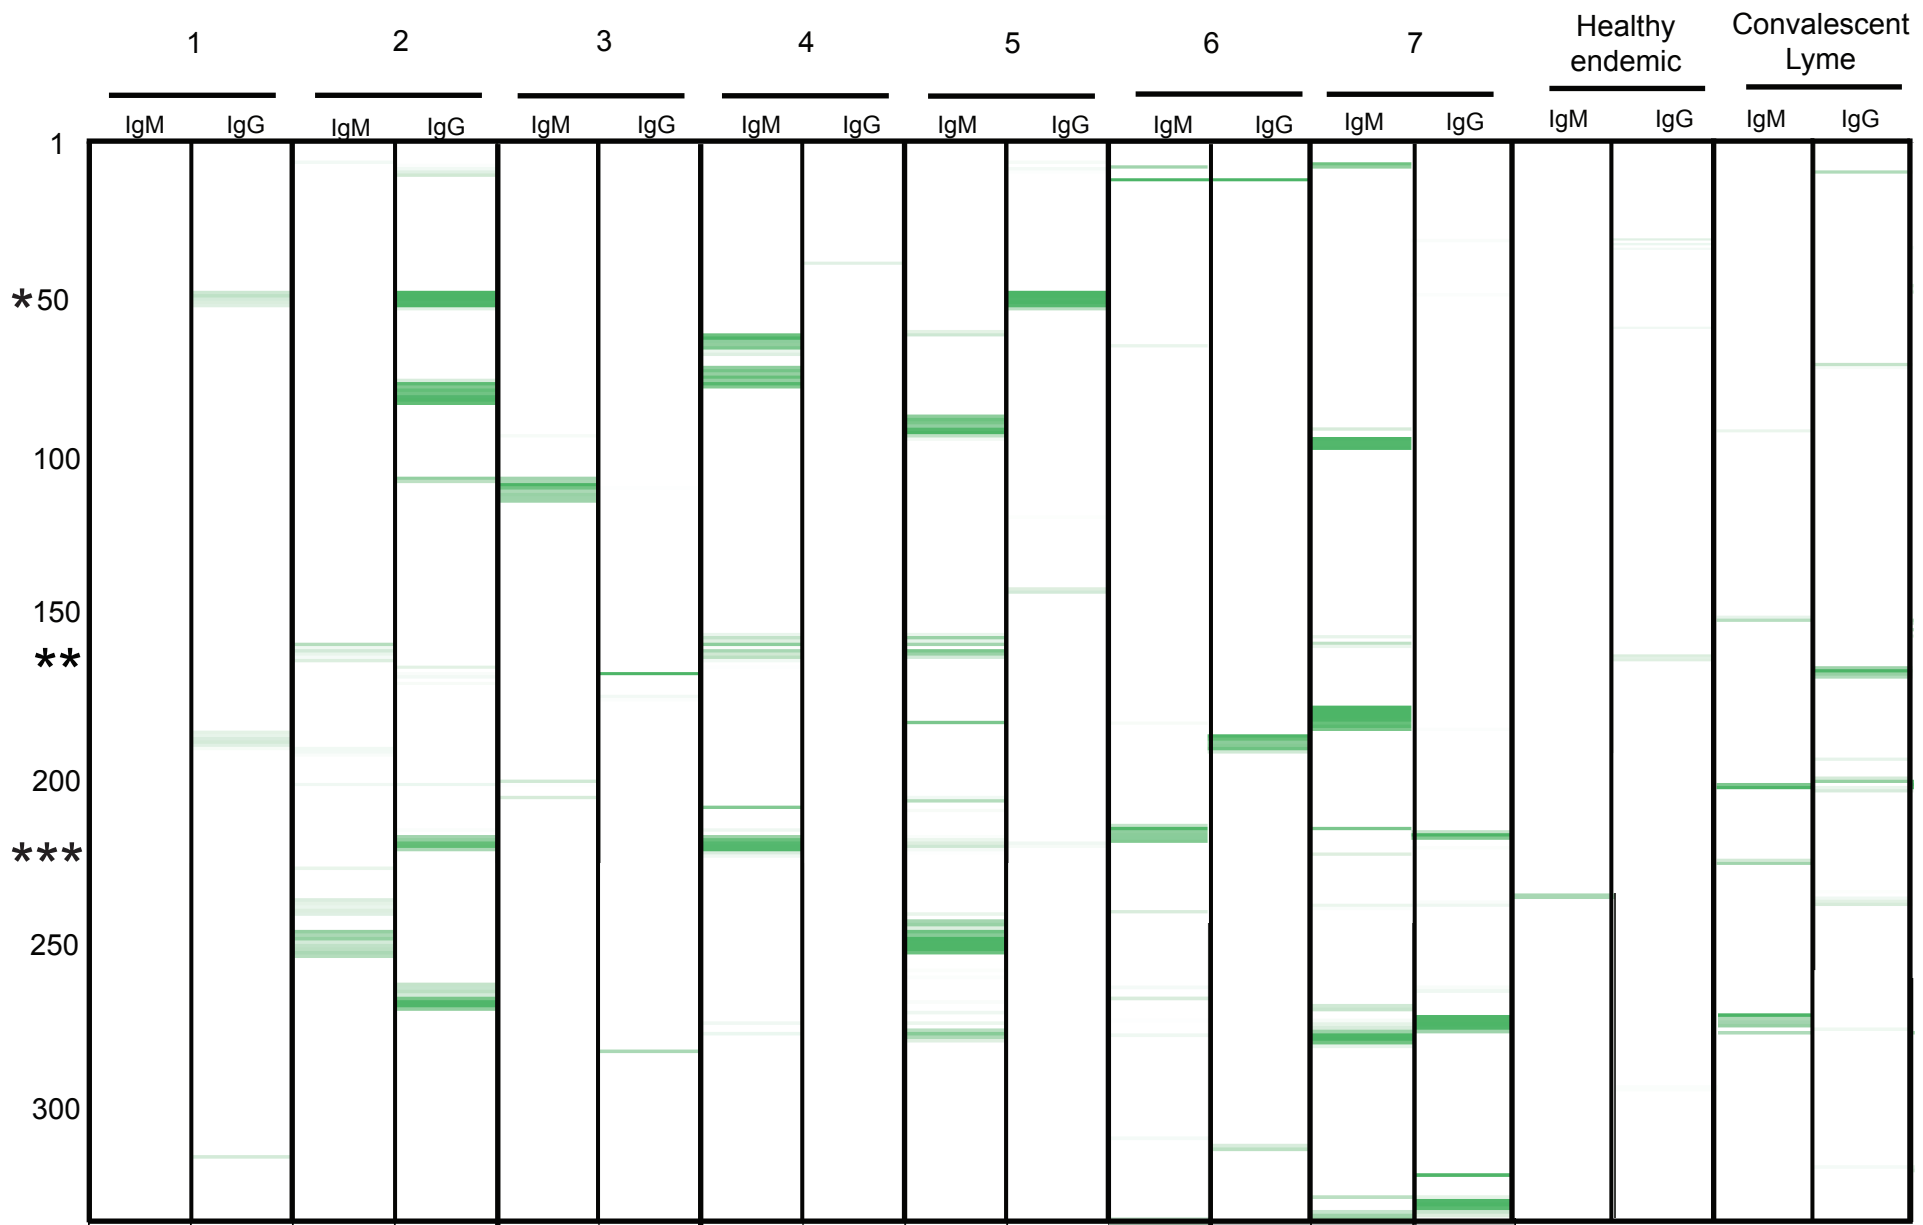

Figure 7

A

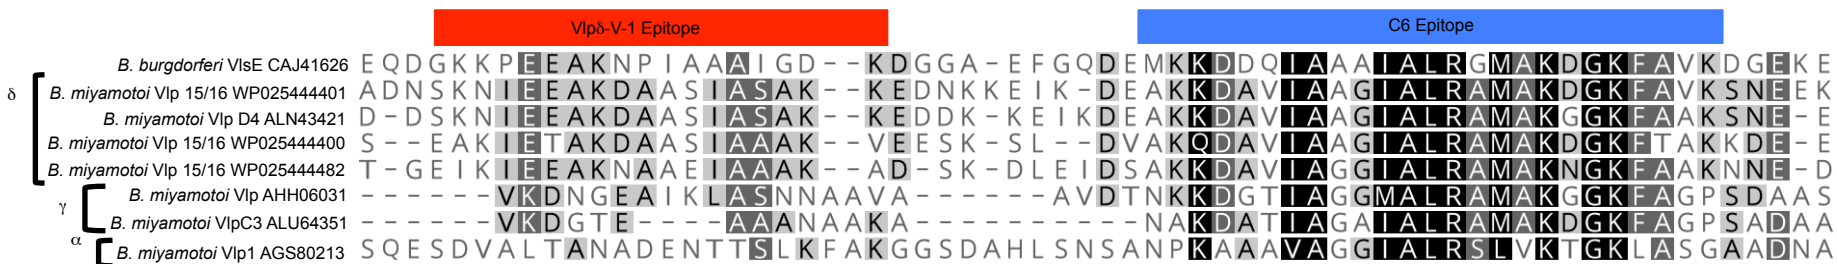

B

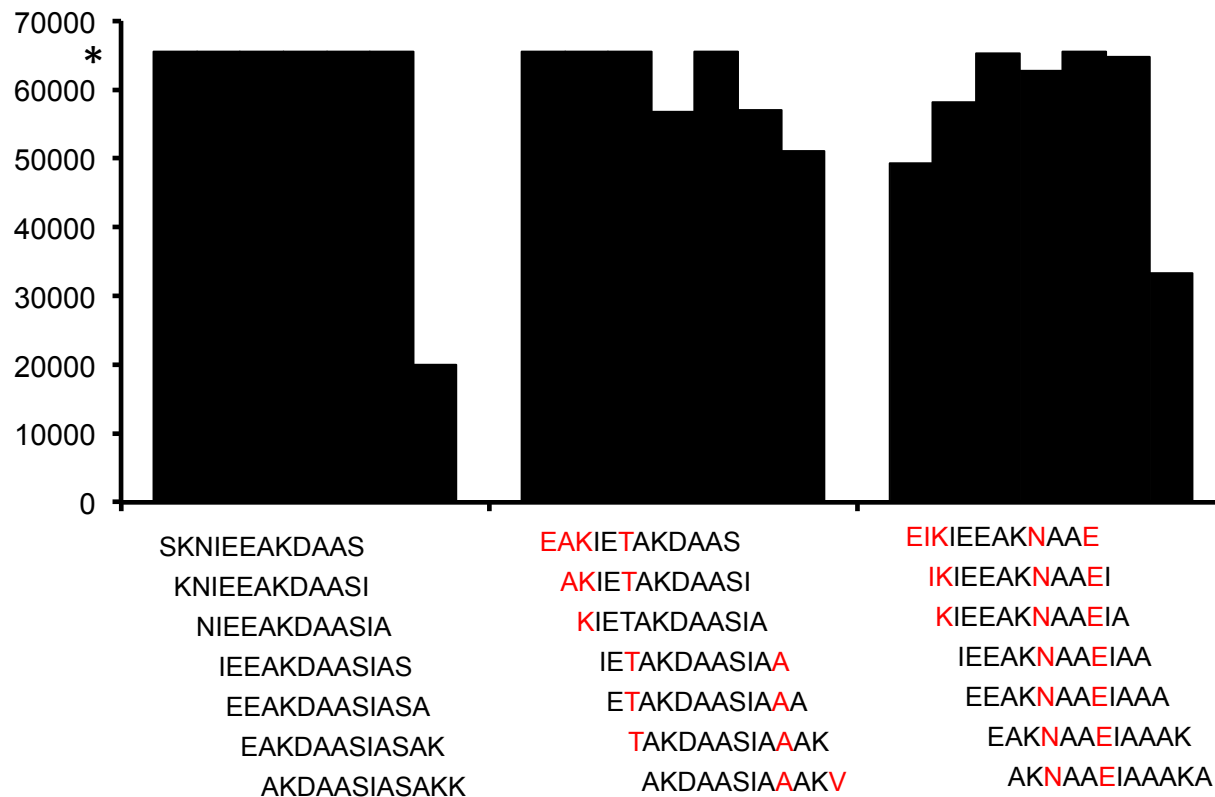

Source: https://www.biorxiv.org/content/biorxiv/early/2019/08/20/741009.full.pdf
